# Supplementary material
Source: PubMed Central journal article supplement (PMC8904708)
Supplement: 11606_2021_6946_MOESM1_ESM.pdf [file 11606_2021_6946_MOESM1_ESM.pdf]

## Appendix I: Wording of measure for support roles, support techniques and caregiving experience

### Support Role Measures

|                                                                                                                                                                                                        |
|--------------------------------------------------------------------------------------------------------------------------------------------------------------------------------------------------------|
| <p><b>Self-management roles, answered by patients:</b><br/>           How often does (family supporter name) do the following?<br/>           Response: Likert 1= None of the time 5=Almost always</p> |
| Help you remember when you have medical appointments to go to                                                                                                                                          |
| Talk with you about what to do when your test results change. For example, when your sugar or blood pressure is high.                                                                                  |
| Help you remember to do home testing. For example, check your sugar or blood pressure at home.                                                                                                         |
| Help you decide when to call your doctor or clinic nurse to talk about a health problem                                                                                                                |
| Help you remember to refill your medicines                                                                                                                                                             |
| Help you remember to take your medicines                                                                                                                                                               |
| In the past six months, how often did (family supporter name) come in the exam room with you for your VA primary care appointment?                                                                     |
| Help you choose healthy food to eat                                                                                                                                                                    |
| Help you figure out how to get things done at the VA clinic. For example, how to make VA appointments or how to contact a VA doctor                                                                    |
| Encourage you to exercise                                                                                                                                                                              |
| <p><b>Online engagement, answered by family supporters:</b><br/>           Response: Likert 0=Never 5=More than once per week</p>                                                                      |
| How often do you visit the MyHealtheVet website, the VA personal health record that is available over the internet, to look at information related to (support recipient's name) health?               |
| Over the last six months, how often have you used email, or VA secure messaging, to contact (support recipient name) doctor or health care team?                                                       |
| <p><b>Satisfaction with VA support of caregivers, answered by family supporters:</b><br/>           Response: Likert 0=Completely disagree 10=Completely agree</p>                                     |
| Over the past year, I have been satisfied with the VA's support for <u>my</u> role in (support recipient's name) health care                                                                           |

### Adapted Goal Setting Subscale of Patient Assessment of Chronic Illness Care (PACIC), answered by patient

|                                                                                                                                                                                                                                                                   |
|-------------------------------------------------------------------------------------------------------------------------------------------------------------------------------------------------------------------------------------------------------------------|
| <p>Please choose the option that best indicates how frequently you have done the described things over the past six months. When talking with (family supporter name) about my diabetes, I:<br/>           Response: Likert 1=almost never to 5=almost always</p> |
| Talked about my goals in caring for my diabetes                                                                                                                                                                                                                   |
| Set specific goals or made an action plan to improve my health habits or self-care                                                                                                                                                                                |
| Wrote down my action plan                                                                                                                                                                                                                                         |

### Adapted Problem Areas in Diabetes (PAID-5), answered by Support Person

|                                                                                                                                                                                                               |
|---------------------------------------------------------------------------------------------------------------------------------------------------------------------------------------------------------------|
| <p>For the next five items, consider the degree to which each of the items may have distressed or bothered you during the past 6 months<br/>           Response: Likert 0=not a problem 4=serious problem</p> |
| Feeling scared when you think about the fact that [patient name] has diabetes.                                                                                                                                |

|                                                                                                     |
|-----------------------------------------------------------------------------------------------------|
| Feeling depressed when you think about the fact that [patient name] has diabetes.                   |
| Worrying about the future and the possibility that [patient name] will get serious complications.   |
| Feeling overwhelmed by having to help [patient name] manage his/her diabetes.                       |
| Feeling guilty or anxious about not helping [patient name] enough with his/her diabetes management. |

**Adapted Stanford Self-Efficacy in Chronic Disease Scale, answered by Support Person**

|                                                                                                                                                            |
|------------------------------------------------------------------------------------------------------------------------------------------------------------|
| How confident are you that:<br>Response: Likert 0=not at all confident 10=extremely confident                                                              |
| You can help [patient name] do all the things necessary to manage diabetes?                                                                                |
| You can judge when the changes in [patient name]'s diabetes mean he/she should visit or call a doctor?                                                     |
| You can help [patient name] do the different daily tasks and activities needed to manage his/her diabetes?                                                 |
| You can help [patient name] reduce the emotional distress caused by diabetes so that it does not affect his/her everyday life?                             |
| You can help [patient name] do things other than just taking medication to reduce how much diabetes affects his/her health?                                |
| You could help [patient name] with checking his/her sugar level at home, if they wanted you to help?                                                       |
| You could help [patient name] figure out what to do next if his/her sugars were running too high?                                                          |
| If [patient name] uses insulin, how confident are you that you could help patient name] use (or draw up or inject) his/her insulin, if s/he wanted you to? |

## Appendix 2:

### Patients Rating Supporter Help With Task 5/5 (Almost Always) at Baseline

| Support Role                                                      | Intervention<br>n*/N† (%) | Control<br>n*/N† (%) |
|-------------------------------------------------------------------|---------------------------|----------------------|
| Help remembering to go to appointments                            | 21/123 (17%)              | 27/116 (23%)         |
| Help reviewing home testing results                               | 11/115 (10%)              | 15/105 (14%)         |
| Help remembering to perform home testing                          | 9/115 (8%)                | 14/106 (13%)         |
| Help deciding when to contact healthcare providers about concerns | 18/123 (15%)              | 24/115 (21%)         |
| Help remembering to refill medications                            | 12/123 (10%)              | 17/116 (15%)         |
| Help remembering to take medications                              | 18/123 (15%)              | 27/116 (23%)         |
| Coming into patient's medical appointments                        | 19/123 (15%)              | 23/115 (20%)         |
| Help with choosing healthy foods                                  | 31/123 (25%)              | 22/116 (19%)         |
| Help navigating healthcare system                                 | 5/123 (4%)                | 12/115 (10%)         |
| Help with encouragement to exercise                               | 30/122 (25%)              | 34/116 (29%)         |

\*n=number of participants who rated supporter involvement 5/5 in each arm

†N=total number of participants in each arm who answered this question
